# Supplementary material for: SGLT-2 inhibitors and in-stent restenosis-related events after acute myocardial infarction: an observational study in patients with type 2 diabetes
Source: Springer Nature journal article supplement (doi:10.1186/s12916-023-02781-2), 2023-02-24
Supplement: MOESM1 [file 24064318]

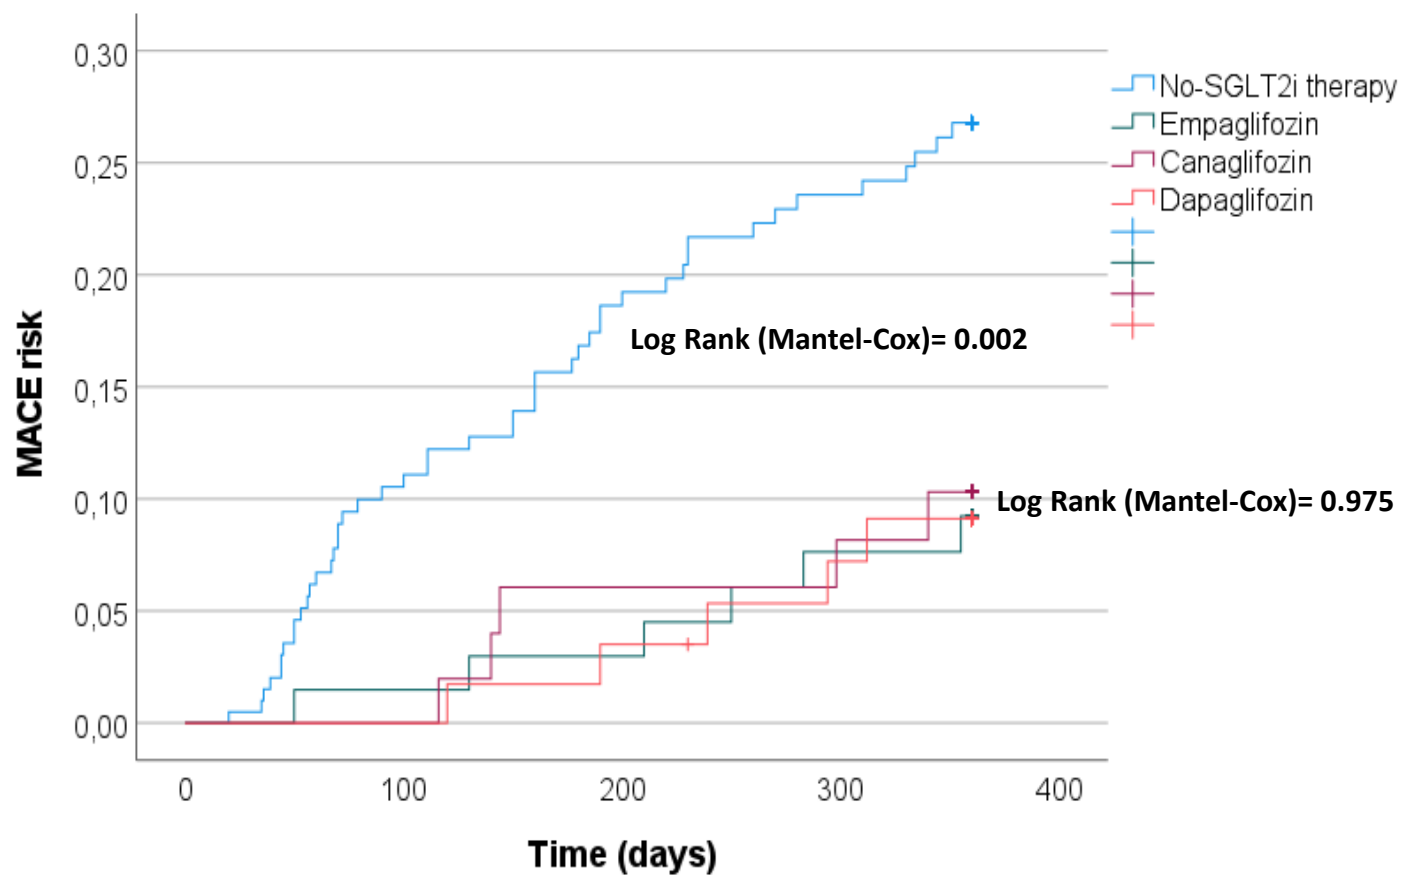

**Supplementary Figure 1. Risk of ISR-related MACE according to the use of different SGLT2i.** Kaplan-Meier curves showing the risk of MACE in patients treated with either empagliflozin, canagliflozin, or dapagliflozin and compared with no-SGLT2i users, along with the relative values derived from Log Rank tests. No differences were observed between different drugs.
